# Supplementary material
Source: PubMed Central journal article supplement (PMC7702278)

## Supplementary Material

For

### Cultivation of Lipid-Producing Bacteria with Lignocellulosic Biomass: Effects of Inhibitory Compounds of Lignocellulosic Hydrolysates

Baixin Wang<sup>1</sup>; Yohannes H. Rezenom<sup>2</sup>; Kun-Ching Cho<sup>1</sup>; Janessa L. Tran<sup>1</sup>; Do Gyun Lee<sup>1</sup>; David H. Russell<sup>2</sup>; Jason J. Gill<sup>3</sup>; Ryland Young<sup>3</sup>, and Kung-Hui Chu<sup>1\*</sup>

<sup>1</sup>Zachry Department of Civil Engineering, <sup>2</sup>Department of Chemistry, and <sup>3</sup>Center for Phage Technology, Department of Biochemistry and Biophysics, Texas A&M University, College Station, TX 77843-3136

**Scheme 1.** Metabolic pathways of model inhibitory compounds

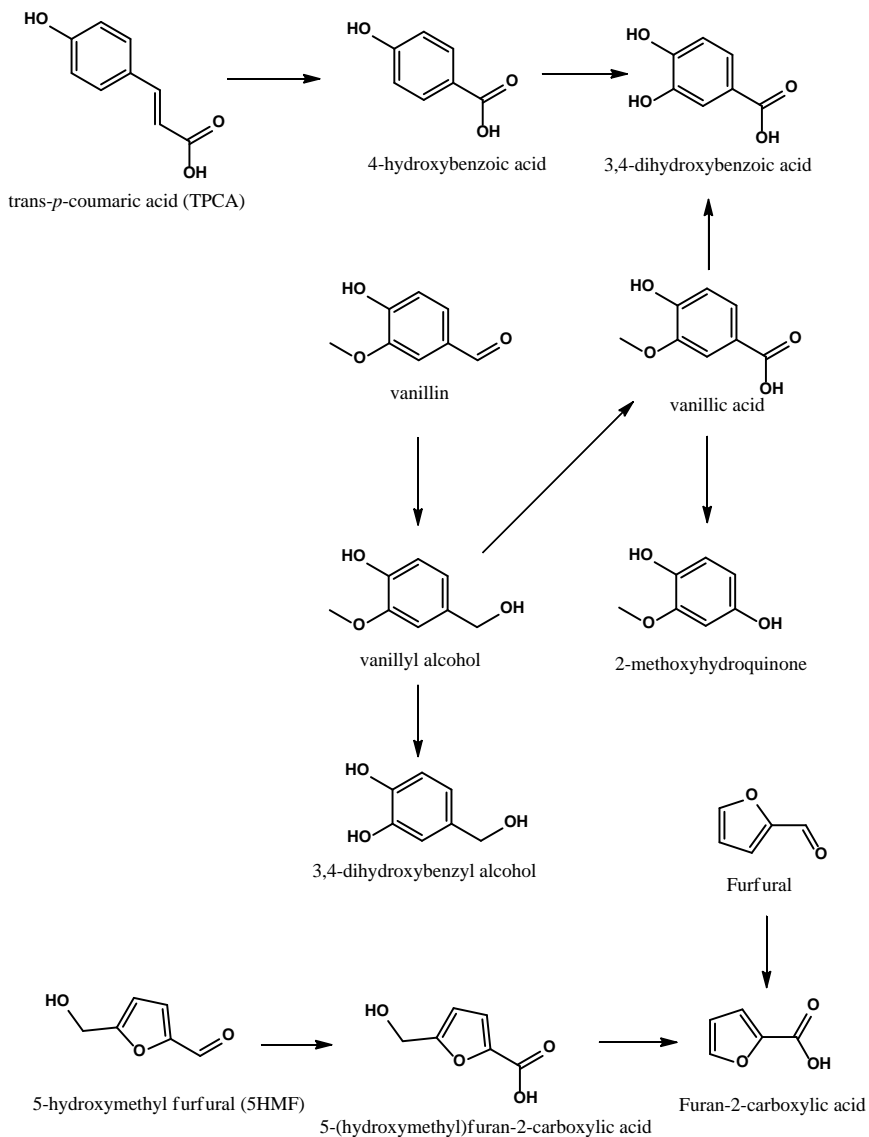

Supplement: NIHMS1037406-supplement-supplementary.pdf [file NIHMS1037406-supplement-supplementary.pdf]
